# Supplementary figures and images for: The Application of Heptamethine Cyanine Dye DZ-1 and Indocyanine Green for Imaging and Targeting in Xenograft Models of Hepatocellular Carcinoma
Source: PubMed Central journal article supplement (PMC5486152; doi:10.3390/ijms18061332), 2017-06-21

# Supplemental Figure

A

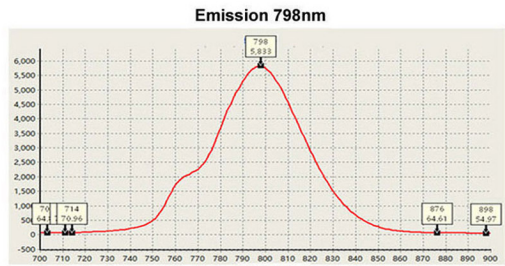

B DZ-1 Emission wavelength

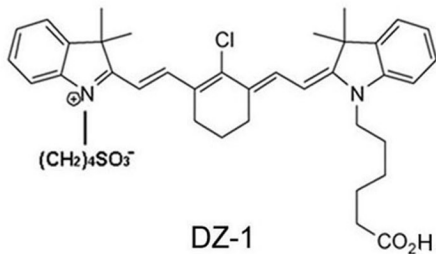

C

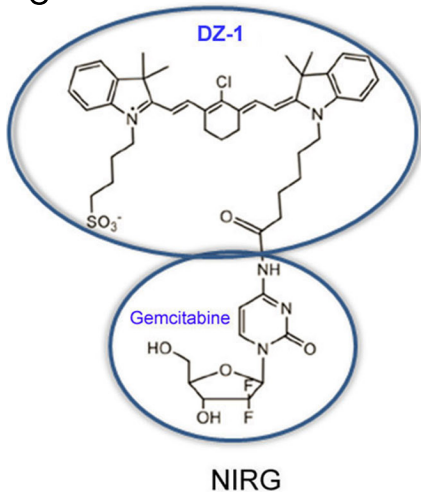

Supplement: ijms-18-01332-s001.pdf [file ijms-18-01332-s001.pdf]
